# Supplementary material for: Oxidation of ascorbic acid by a (salen)ruthenium(vi) nitrido complex in aqueous solution
Source: Royal Society of Chemistry journal article supplement (doi:10.1039/c4cc07568d), 2014-11-05
Supplement: c4cc07568d1.pdf [file c4cc07568d1.pdf]

## Supporting Information

### Oxidation of Ascorbic Acid by a (Salen)ruthenium(VI) Nitrido Complex in Aqueous Solution

Qian Wang, Wai-Lun Man, William W. Y. Lam and Tai-Chu Lau\*

Institute of Molecular Functional Materials and Department of Biology and Chemistry, City University of Hong Kong, Tat Chee Avenue, Kowloon Tong, Hong Kong, P. R. China.

Email: [bhtclau@cityu.edu.hk](mailto:bhtclau@cityu.edu.hk)

#### Table of Content

|                                                                                                                                                                                                                                                                                         | <i>Page</i> |
|-----------------------------------------------------------------------------------------------------------------------------------------------------------------------------------------------------------------------------------------------------------------------------------------|-------------|
| Experimental details                                                                                                                                                                                                                                                                    | <i>S2</i>   |
| Table S1 Representative second-order rate constants for the oxidation of H <sub>2</sub> A by Ru <sup>VI</sup> (N) at 298.0 K and <i>I</i> = 0.1 M.                                                                                                                                      | <i>S4</i>   |
| Table S2 Temperature dependence of the second-order rate constant for the oxidation of H <sub>2</sub> A by Ru <sup>VI</sup> (N) at <i>I</i> = 0.1 M.                                                                                                                                    | <i>S5</i>   |
| Fig. S1 UV-vis spectrum of pure [Ru <sup>III</sup> (L)(OH <sub>2</sub> ) <sub>2</sub> ] <sup>+</sup> in 1 mM TFA (red) and the final UV-vis spectrum obtained for the decomposition (N···N coupling) of Ru <sup>VI</sup> (N) (1.30 × 10 <sup>-4</sup> M) in 1 mM TFA after 7 d (black). | <i>S6</i>   |
| Fig. S2 UV-vis spectral changes for the decomposition (N···N coupling) of Ru <sup>VI</sup> (N) (1.30 × 10 <sup>-4</sup> M) in 1 mM TFA aqueous solution.                                                                                                                                | <i>S7</i>   |
| Fig. S3 Temperature dependence for the reactions of Ru <sup>VI</sup> (N) and H <sub>2</sub> A.                                                                                                                                                                                          | <i>S8</i>   |
| Fig. S4 ESI mass spectrum of the reaction mixture of Ru <sup>VI</sup> (N) and H <sub>2</sub> A in H <sub>2</sub> O (pH = 1.0) taken after 60 min.                                                                                                                                       | <i>S9</i>   |
| Fig. S5 The expanded peak at <i>m/z</i> 635 for the reaction mixture of Ru <sup>VI</sup> (N) and H <sub>2</sub> A carried out in D <sub>2</sub> O.                                                                                                                                      | <i>S10</i>  |
| Fig. S6 CV of the product solution taken at pH 4.9.                                                                                                                                                                                                                                     | <i>S11</i>  |
| Fig. S7 <sup>1</sup> H NMR spectrum in D <sub>2</sub> O of the residue obtained from the reaction of Ru <sup>VI</sup> (N) (3.26 × 10 <sup>-3</sup> mmol) and H <sub>2</sub> A (6.52 × 10 <sup>-3</sup> mmol) in H <sub>2</sub> O at pH 1.0.                                             | <i>S12</i>  |

**Materials.**  $[\text{Ru}^{\text{VI}}(\text{N})(\text{L})(\text{MeOH})](\text{PF}_6)$  and the 50%  $^{15}\text{N}$ -labeled complex were prepared by a literature method.<sup>1</sup> *L*-Ascorbic acid (Aldrich) was purified by recrystallization from MeOH/Et<sub>2</sub>O. Trifluoroacetic acid (Aldrich,  $\geq 99.0\%$ ), sodium acetate (Aldrich,  $\geq 99.0\%$ ), acetic acid (Aldrich, 99.8%), sodium phosphate monobasic dihydrate (Sigma,  $\geq 99.0\%$ ), sodium phosphate dibasic dihydrate (Sigma,  $\geq 99.0\%$ ), and deuterium oxide (Cambridge Isotope, 99.8 atom % D) were used as received. Water for kinetic experiments was distilled twice from alkaline permanganate. Ionic strength was maintained with sodium trifluoroacetate (Aldrich, 98%). The pH values of solutions used for kinetic experiments were determined either by direct titration with standard NaOH solutions or by using a pH meter (Mettler Toledo, FE 20). For D<sub>2</sub>O solutions, the pD values were obtained from a pH meter using the relationship  $\text{pD} = \text{pH}_{\text{meas}} + 0.4$ .

**Instrumentation.** Kinetic experiments were carried out using either an Agilent 8453 diode-array spectrophotometer for slow reactions, or an Applied Photophysics SX20 stopped-flow spectrophotometer for fast reactions. The temperature of the solutions was maintained with a PolyScience digital temperature controller connected to a circulating water bath. Electrospray ionization mass spectra (ESI-MS) were obtained on a PE SCIEX API 2000 mass spectrometer. The analyte solution was continuously infused with a syringe pump at a constant flow rate of 5  $\mu\text{L min}^{-1}$  into the pneumatically assisted electrospray probe with nitrogen as the nebulizing gas. The declustering potential was typically set at 10 V. Cyclic voltammetry (CV) was performed with a CH Instruments Electrochemical Workstation CHI660C. A glassy carbon working electrode, a calomel reference electrode, and a Pt wire counter electrode. <sup>1</sup>H NMR spectra were recorded on a Bruker (400 MHz) FT-NMR spectrometer.

**Kinetics.** The concentrations of H<sub>2</sub>A were at least in 10-fold excess than that of Ru<sup>VI</sup>(N). The reaction progress was monitored by observing absorbance changes at 640 nm. Pseudo-first-order rate constants,  $k_{\text{obs}}$ , were obtained by nonlinear least-squares fits of  $A_t$  versus time  $t$  according to the equation  $A_t = A_\infty + (A_0 - A_\infty) \exp(-k_{\text{obs}}t)$ , where  $A_0$  and  $A_\infty$  are the initial and final absorbances, respectively.<sup>2</sup>

**Product analysis by ESI-MS.** In a typical reaction, H<sub>2</sub>A ( $2.38 \times 10^{-4}$  M) was allowed to react with Ru<sup>VI</sup>(N) ( $1.19 \times 10^{-4}$  M) in H<sub>2</sub>O (2 mL) at different pH at 25 °C. The resulting green solution was analysed by ESI-MS after 5 min (pH = 5.5) and 60 min (pH = 1.0).

**Product analysis by <sup>1</sup>H NMR.** In a typical reaction, a mixture containing H<sub>2</sub>A ( $6.16 \times 10^{-3}$  mmol) and Ru<sup>VI</sup>(N) ( $3.08 \times 10^{-3}$  mmol) in 20 mL H<sub>2</sub>O (pH = 5.5) was stirred for 15 min at 25 °C under argon atmosphere. At pH 1.0, H<sub>2</sub>A ( $6.52 \times 10^{-3}$  mmol) and Ru<sup>VI</sup>(N) ( $3.26 \times 10^{-3}$  mmol) were used and the mixture was stirred for 60 min. The volatiles were then removed by reduced pressure at 25 °C. The residue was dissolved in 1 mL of D<sub>2</sub>O containing methanol ( $1.63 \times 10^{-3}$  mmol) as internal standard, and the mixture was analyzed by <sup>1</sup>H NMR.

## References

1. W. L. Man, T. M. Tang, T. W. Wong, T. C. Lau, S. M. Peng, W. T. Wong. *J. Am. Chem. Soc.* **2004**, *126*, 478
2. J. H. Espenson. *Chemical Kinetics and Reaction Mechanisms*; McGraw Hill: New York, 1981.

**Table S1.** Representative second-order rate constants for the oxidation of H<sub>2</sub>A by Ru<sup>VI</sup>(N) at 298.0 K and *I* = 0.1 M.

| <b>pH/pD</b>      | <b><i>k</i><sub>2</sub> / M<sup>-1</sup> s<sup>-1</sup></b> |
|-------------------|-------------------------------------------------------------|
| 1.00              | (3.87 ± 0.02)                                               |
| 1.00 <sup>a</sup> | (1.39 ± 0.01)                                               |
| 2.12              | (5.14 ± 0.01) × 10 <sup>1</sup>                             |
| 2.12 <sup>a</sup> | (2.08 ± 0.11) × 10 <sup>1</sup>                             |
| 2.67              | (1.20 ± 0.01) × 10 <sup>2</sup>                             |
| 3.20              | (3.82 ± 0.04) × 10 <sup>2</sup>                             |
| 3.57              | (7.99 ± 0.02) × 10 <sup>2</sup>                             |
| 3.68 <sup>a</sup> | (3.52 ± 0.01) × 10 <sup>2</sup>                             |
| 3.94              | (1.35 ± 0.01) × 10 <sup>3</sup>                             |
| 3.99              | (1.60 ± 0.01) × 10 <sup>3</sup>                             |
| 4.03 <sup>a</sup> | (6.74 ± 0.04) × 10 <sup>2</sup>                             |
| 4.41              | (2.56 ± 0.05) × 10 <sup>3</sup>                             |
| 4.47 <sup>a</sup> | (1.41 ± 0.04) × 10 <sup>3</sup>                             |
| 4.80 <sup>a</sup> | (2.32 ± 0.03) × 10 <sup>3</sup>                             |
| 4.90              | (3.52 ± 0.06) × 10 <sup>3</sup>                             |
| 5.39              | (4.36 ± 0.01) × 10 <sup>3</sup>                             |
| 6.05 <sup>a</sup> | (4.63 ± 0.10) × 10 <sup>3</sup>                             |
| 6.16              | (4.93 ± 0.11) × 10 <sup>3</sup>                             |

<sup>a</sup> Experiments were carried out in D<sub>2</sub>O.

**Table S2.** Temperature dependence of the second-order rate constant for the oxidation of H<sub>2</sub>A by Ru<sup>VI</sup>(N).

| <b>T / K</b> | <b>pH</b> | <b><math>k_2 / \text{M}^{-1} \text{s}^{-1}</math></b> |
|--------------|-----------|-------------------------------------------------------|
| 292.0        | 1.00      | (2.87 ± 0.04)                                         |
| 298.0        | 1.00      | (3.87 ± 0.02)                                         |
| 305.5        | 1.00      | (5.80 ± 0.04)                                         |
| 313.0        | 1.00      | (8.82 ± 0.01)                                         |
| 291.0        | 5.39      | (2.93 ± 0.01) × 10 <sup>3</sup>                       |
| 298.0        | 5.39      | (4.36 ± 0.18) × 10 <sup>3</sup>                       |
| 305.9        | 5.39      | (6.33 ± 0.12) × 10 <sup>3</sup>                       |
| 313.0        | 5.39      | (8.75 ± 0.06) × 10 <sup>3</sup>                       |

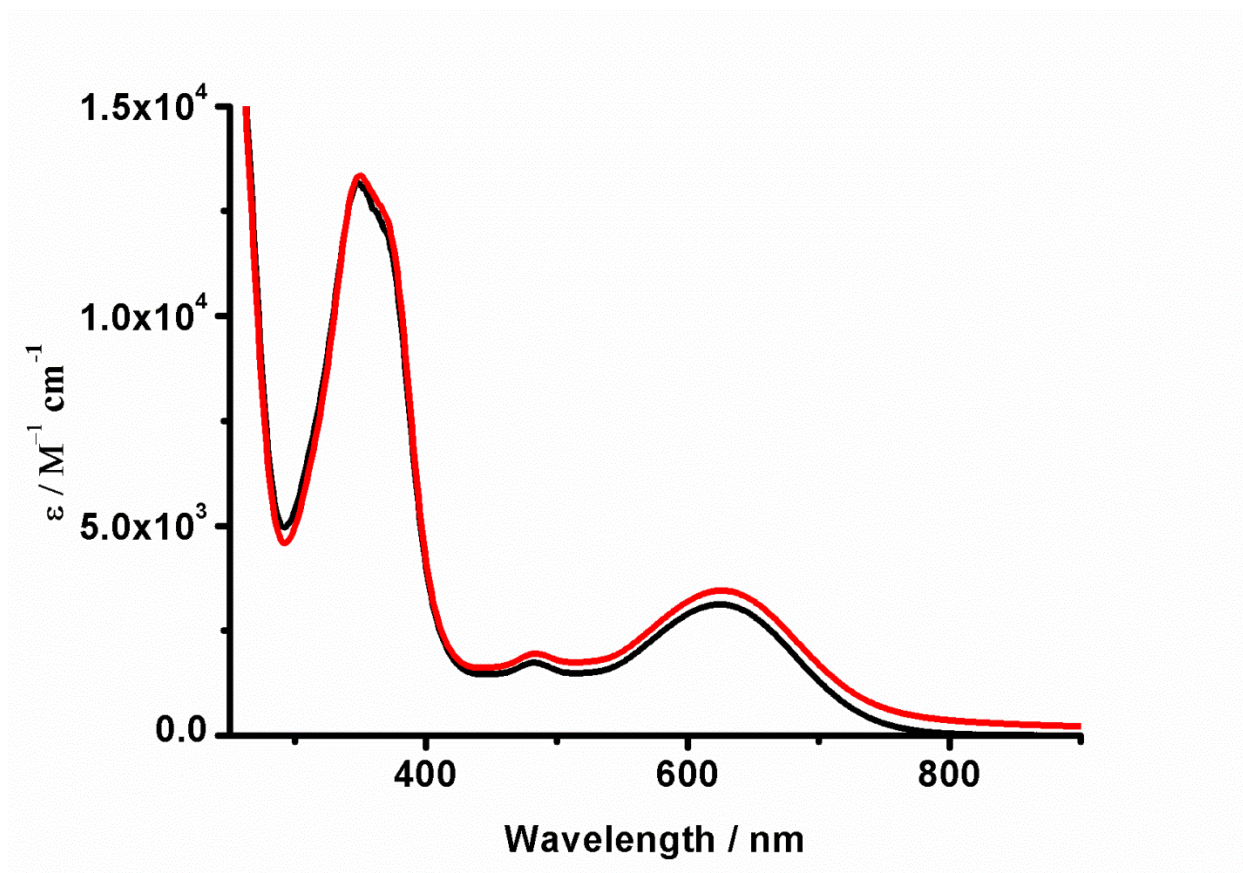

**Fig. S1** UV-vis spectrum of pure  $[\text{Ru}^{\text{III}}(\text{L})(\text{OH}_2)_2]^+$  in 1 mM TFA (red) and the final UV-vis spectrum obtained for the decomposition (N···N coupling) of  $\text{Ru}^{\text{VI}}(\text{N})$  ( $1.30 \times 10^{-4}$  M) in 1 mM TFA after 7 d (black).

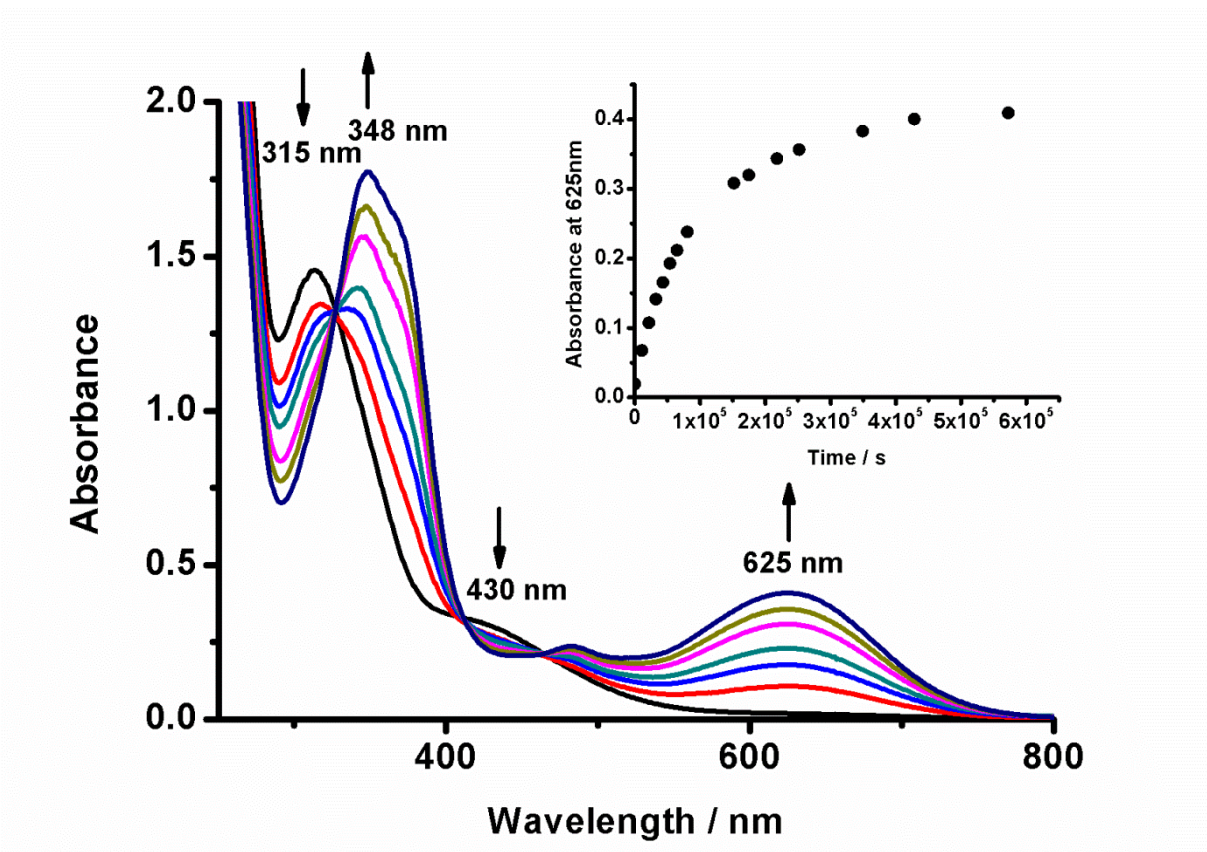

**Fig. S2** UV-vis spectral changes for the decomposition (N···N coupling) of Ru<sup>VI</sup>(N) ( $1.30 \times 10^{-4}$  M) in 1 mM TFA solution (data are collected at 0 h, 6 h, 13 h, 21 h, 42 h, 70 h, and 159 h, respectively). Inset shows the absorbance-time trace at 625 nm.

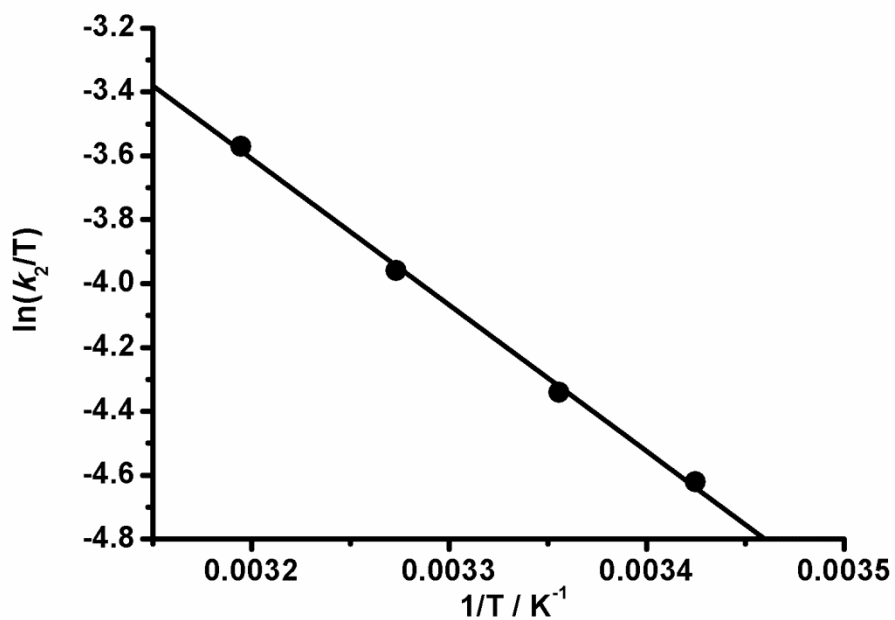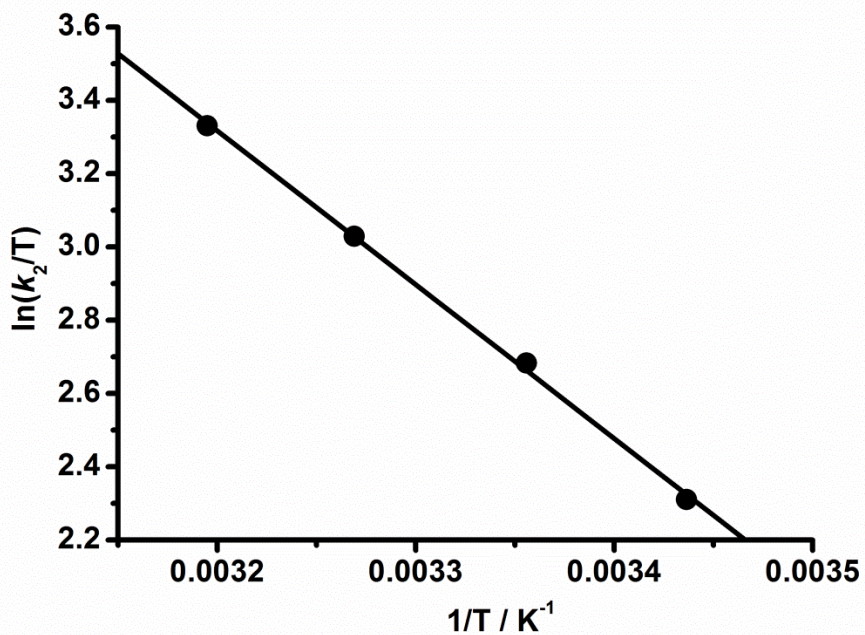

**Fig. S3** Temperature dependence for the reactions of Ru<sup>VI</sup>(N) and H<sub>2</sub>A in pH = 1.00 and *I* = 0.1 M (top) [slope =  $-(4.58 \pm 0.14) \times 10^3$ ; y-intercept =  $(1.10 \pm 0.05) \times 10^1$ ;  $r^2 = 0.9973$ ] and pH = 5.39 and *I* = 0.1 M (bottom) [slope =  $-(4.20 \pm 0.10) \times 10^3$ ; y-intercept =  $(1.68 \pm 0.03)$ ;  $r^2 = 0.9983$ ].



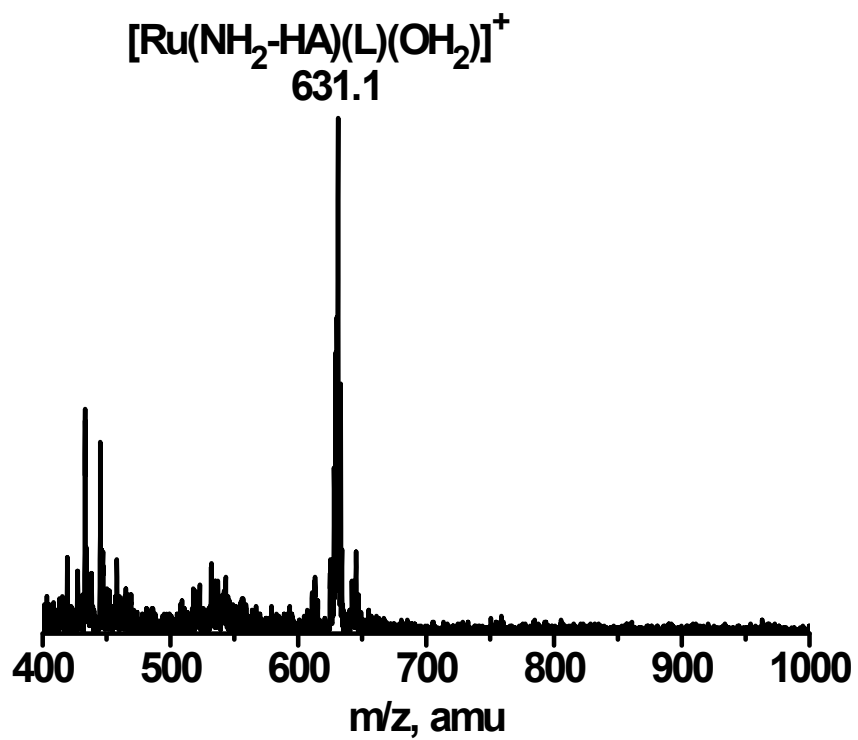

**Fig. S4** ESI mass spectrum of the reaction mixture of  $\text{Ru}^{\text{VI}}(\text{N})$  and  $\text{H}_2\text{A}$  in  $\text{H}_2\text{O}$  ( $\text{pH} = 1.0$ ) taken after 60 min.

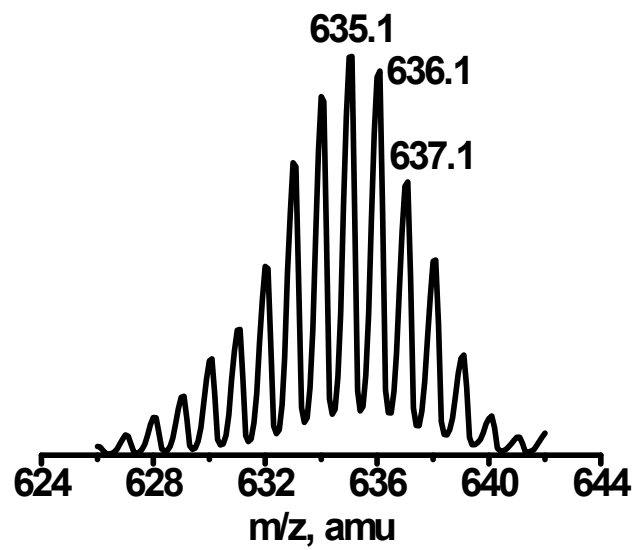

**Fig. S5** The expanded peak at  $m/z$  635 for the reaction mixture of  $\text{Ru}^{\text{VI}}(\text{N})$  and  $\text{H}_2\text{A}$  carried out in  $\text{D}_2\text{O}$ .

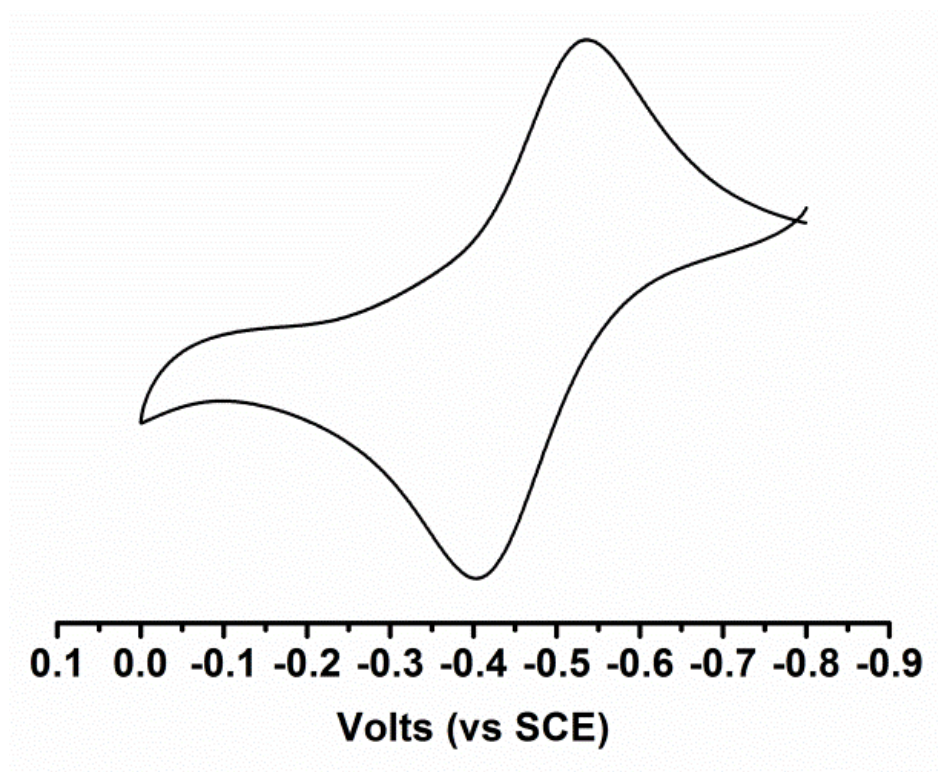

**Fig. S6** CV of the product solution taken at pH 4.9.

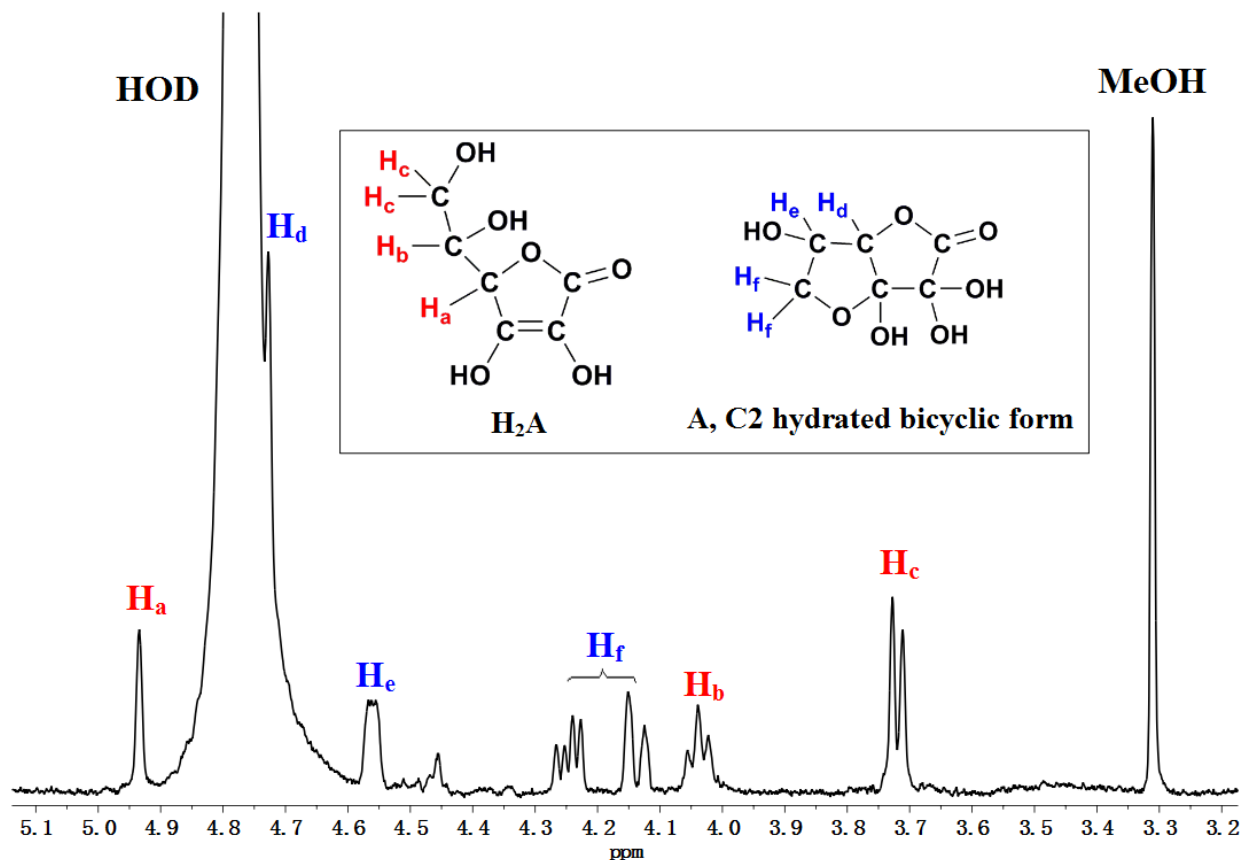

**Fig. S7**  $^1\text{H}$  NMR spectrum in  $\text{D}_2\text{O}$  of the residue obtained from the reaction of  $\text{Ru}^{\text{VI}}(\text{N})$  ( $3.26 \times 10^{-3}$  mmol) and  $\text{H}_2\text{A}$  ( $6.52 \times 10^{-3}$  mmol) in  $\text{H}_2\text{O}$  at pH 1.0. The amount of A produced and  $\text{H}_2\text{A}$  remained were determined to be  $(1.74 \pm 0.04) \times 10^{-3}$  mmol and  $(1.65 \pm 0.09) \times 10^{-3}$  mmol, respectively.
